# Supplementary material for: Co3O4–CuO bimetallic catalyst activated PMS to degrade LEV in wastewater: the existence of dual degradation mechanisms
Source: Royal Society of Chemistry journal article supplement (doi:10.1039/d4nj02812k), 2024-01-01
Supplement: d4nj02812k1.pdf [file d4nj02812k1.pdf]

**Supporting Information :**

**Co<sub>3</sub>O<sub>4</sub>-CuO bimetallic catalyst activated PMS to degrade LEV in wastewater: The existence of dual degradation mechanisms**

**Xiaoning Jia<sup>a,\*</sup>, HaiXin He<sup>a</sup>, Xia Zhao<sup>a</sup>, Yabin Li<sup>a</sup>, Chunxiang Wang<sup>a</sup>, Yanhui Yang<sup>a</sup>, Jingwen Wu<sup>a</sup>**

<sup>a</sup> College of Petrochemical Engineering, Lanzhou University of Technology, Lanzhou 730050, PR China.

**\*Corresponding author.**

Xiaoning Jia

E-mail address: [jxn@lut.edu.cn](mailto:jxn@lut.edu.cn)

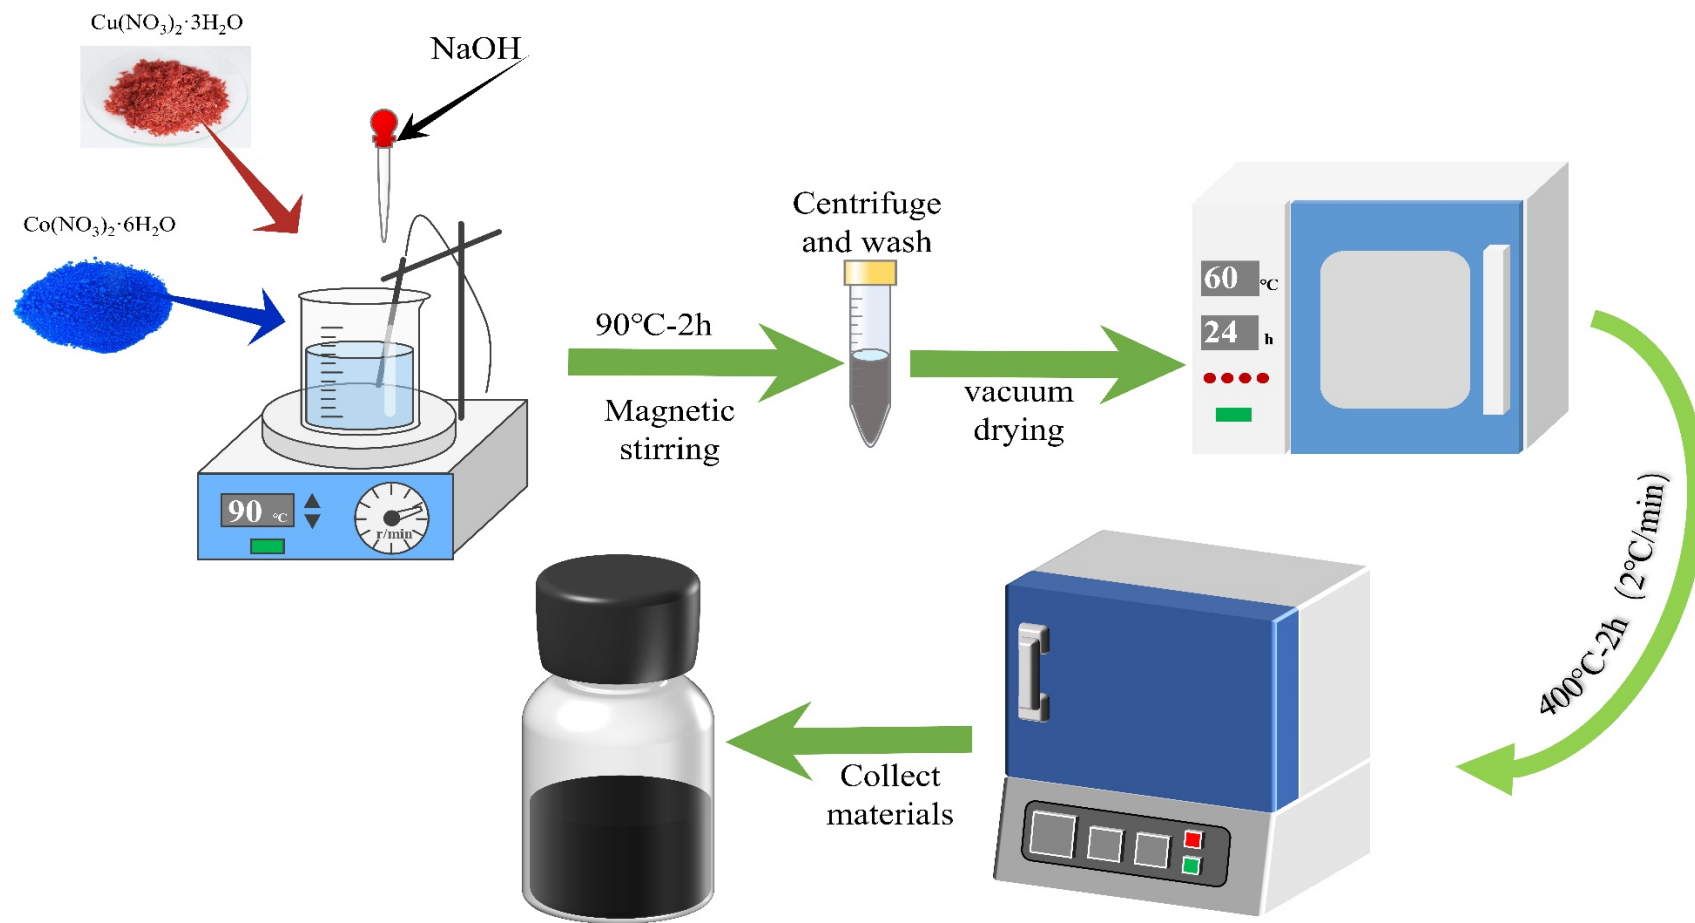

Fig S1 The schematic illustration of synthesis CCO.

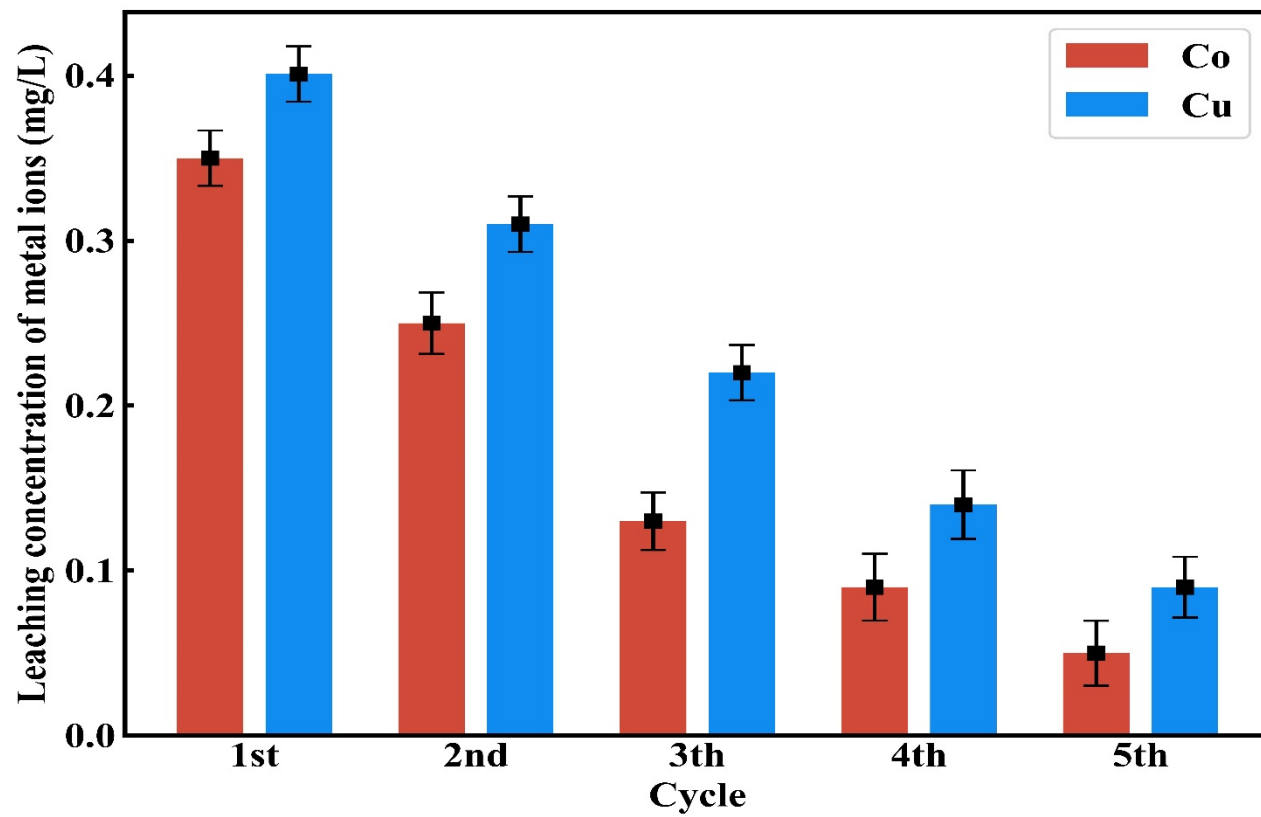

Fig.S2 Co and Cu leaching of CCO/PMS/LEV. Conditions: [LEV] = 20 mg/L, [PMS] = 0.8 g/L, [Catalyst] = 0.2 g/L, T = 298 K and initial solution pH 7.

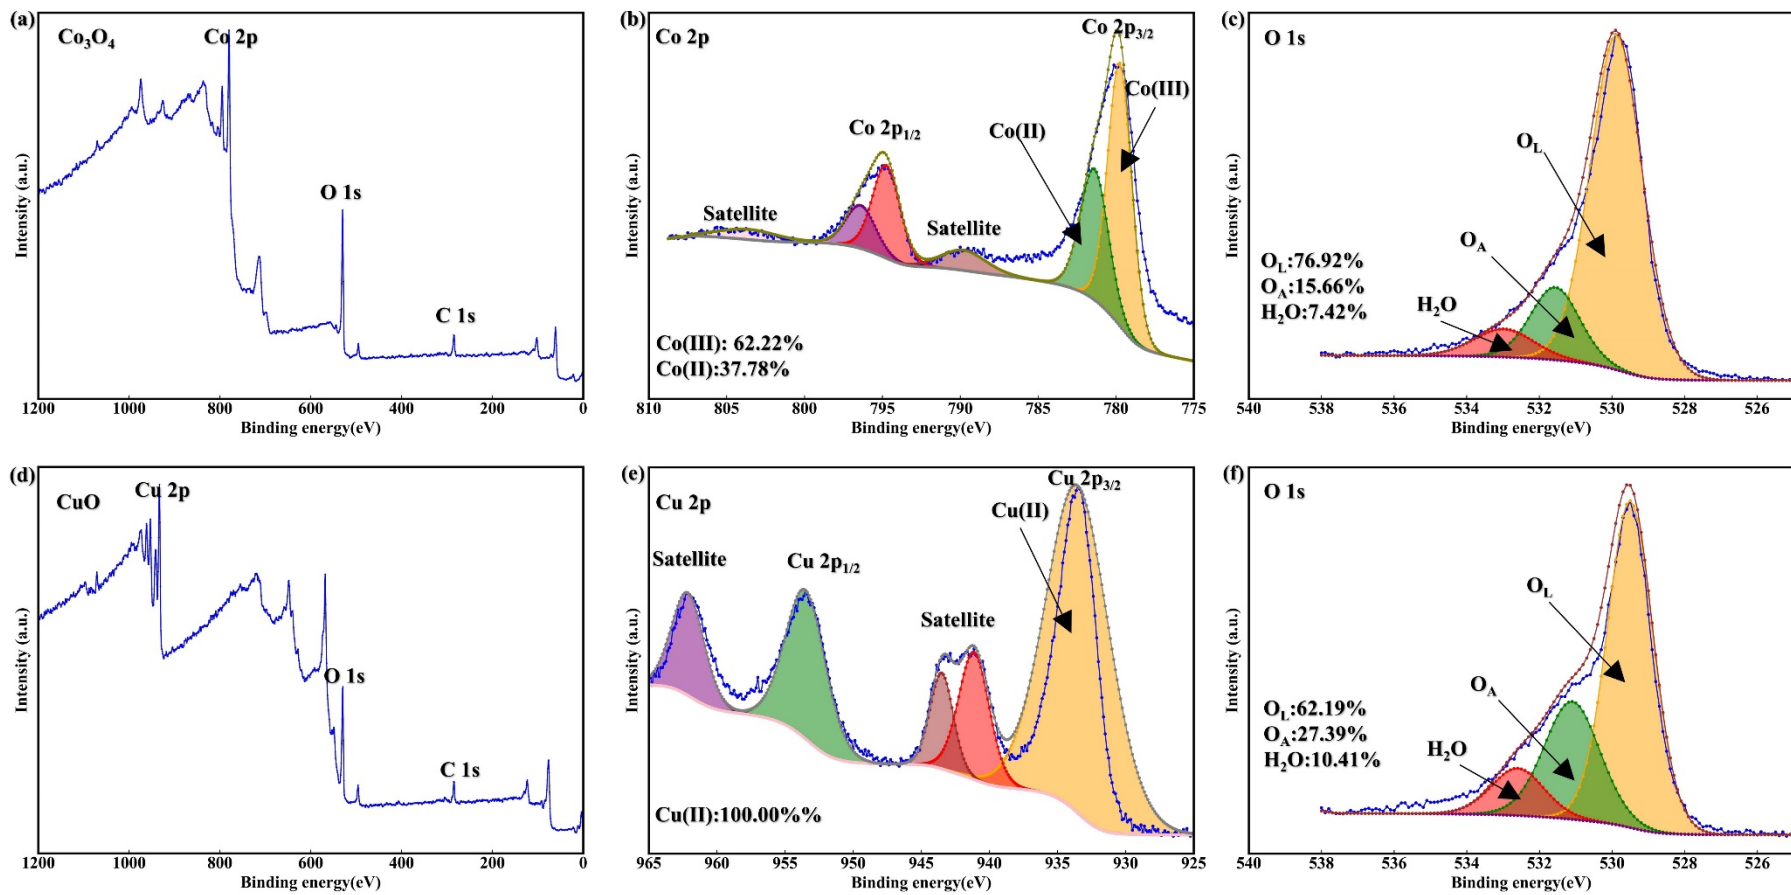

Fig.S3 (a) Full-range scan of the samples,(b) Co 2p, (c) O 1s of Co<sub>3</sub>O<sub>4</sub> and (d) Full-range scan of the samples,(e) Cu 2p, (f) O 1s of CuO

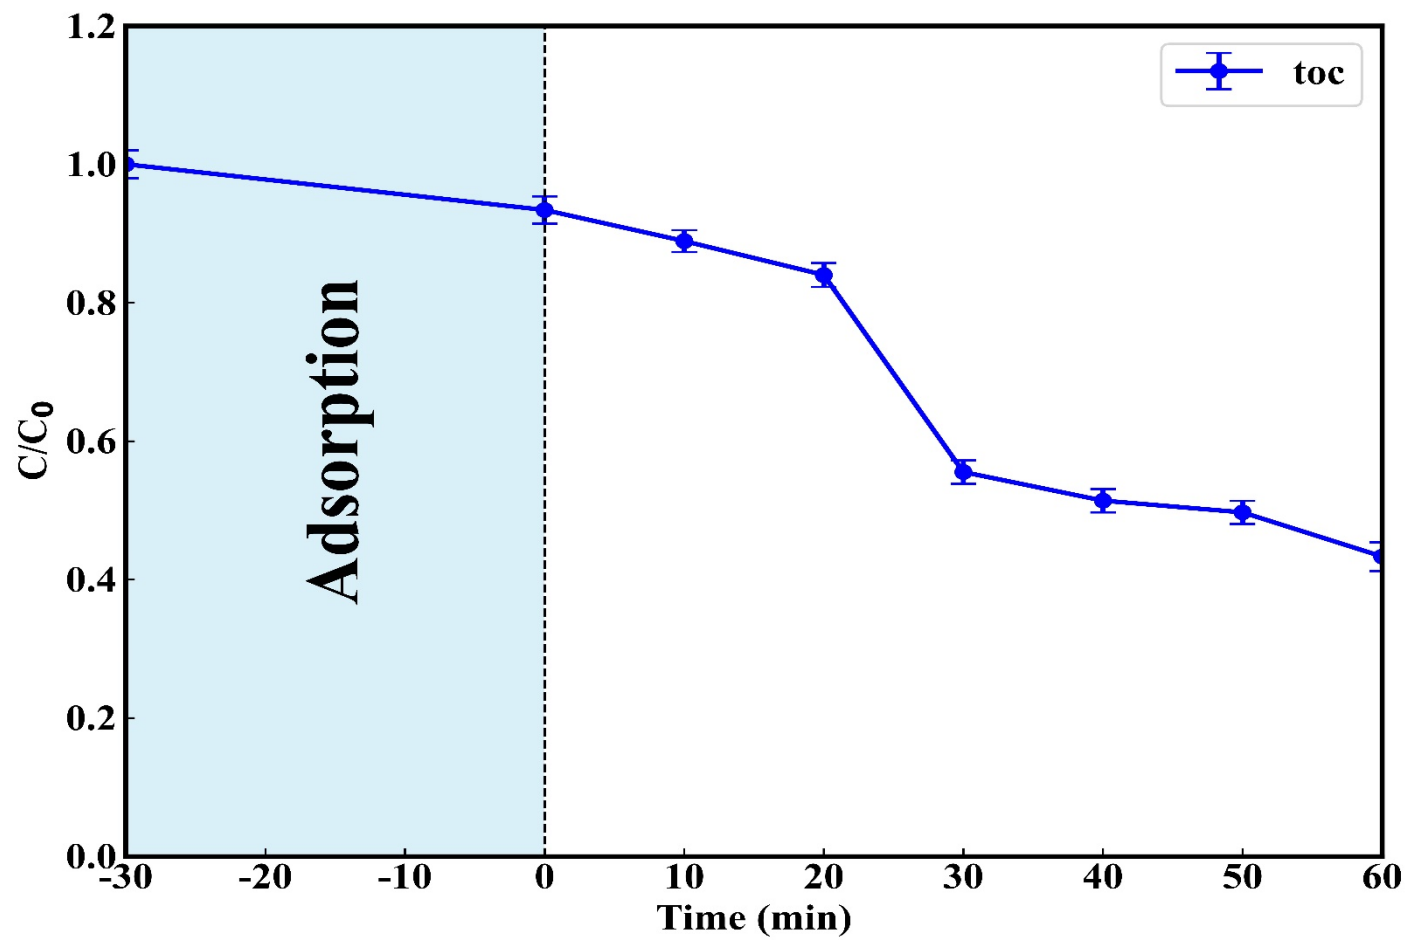

Fig.S4 The efficiency of TOC degradation in CCO/PMS system.

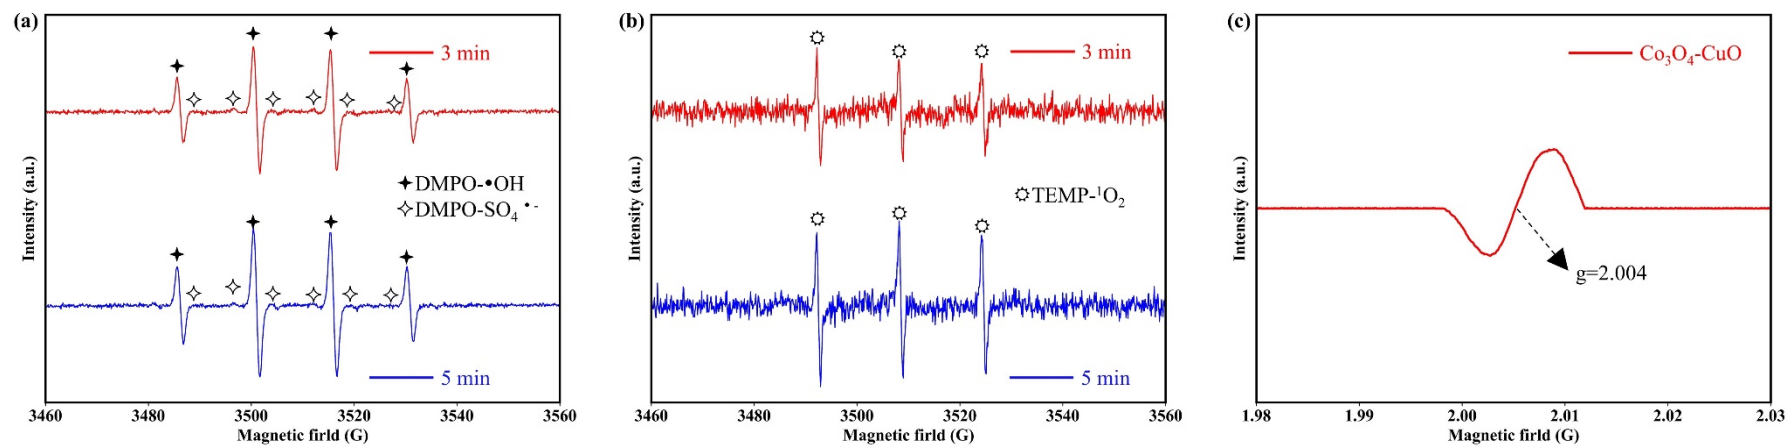

Fig.S5 The EPR spectrum of (a)  $\bullet$ OH and  $\text{SO}_4^{\bullet-}$ , (b)  $^1\text{O}_2$  and (c)  $\text{Co}_3\text{O}_4\text{-CuO}$ .

Table S1. Comparison of catalytic degradation efficiency of LEV based on reported catalysts.

| Catalyst                                                         | Catalyst(mg/L) | LEV(mg/L) | PMS(mg/L) | Degradation efficiency(%) | Time(min ) | Refs      |
|------------------------------------------------------------------|----------------|-----------|-----------|---------------------------|------------|-----------|
| Co <sub>x</sub> /CN                                              | 100            | 20        | 400       | 80                        | 90         | 1         |
| ZnCo-MOF                                                         | 600            | 20        | 922       | 98.3                      | 80         | 2         |
| SrTiO <sub>3</sub> /CoFe <sub>2</sub> O <sub>4</sub> /rGO        | 100            | 20        | 500       | 50%                       | 5          | 3         |
| AlSi <sub>2</sub> Co <sub>4</sub> -200                           | 100            | 20        | 615       | 98.5                      | 80         | 4         |
| LaCoO <sub>3</sub> /Co <sub>3</sub> O <sub>4</sub>               | 100            | 20        | 300       | 90                        | 20         | 5         |
| nZVI/CF-900-0.3                                                  | 200            | 20        | 615       | 93.83                     | 60         | 6         |
| Co <sub>3</sub> O <sub>4</sub> /MnCo <sub>2</sub> O <sub>4</sub> | 400            | 20        | 300       | 88                        | 30         | 7         |
| Eu <sub>2</sub> O <sub>3</sub> /Co <sub>3</sub> O <sub>4</sub>   | 200            | 20        | 307       | 85                        | 20         | 8         |
| Co-Fe PBAs@rGO                                                   | 500            | 20        | 615       | 97.6                      | 30         | 9         |
| CuCoFe-LDH                                                       | 200            | 20        | 500       | 88.07                     | 10         | 10        |
| CCO                                                              | 200            | 20        | 800       | 96                        | 60         | This work |

Table S2. Partial water quality parameters of deionized water, tap water, lake water, and Yellow River water.

| Type of the water body. | pH   | COD (mg/L) | Cl <sup>-</sup> (mg/L) | NO <sub>3</sub> <sup>-</sup> (mg/L) | H <sub>2</sub> PO <sub>4</sub> <sup>-</sup> (mg/L) | HCO <sub>3</sub> <sup>-</sup> (mg/L) |
|-------------------------|------|------------|------------------------|-------------------------------------|----------------------------------------------------|--------------------------------------|
| Tap water               | 7.12 | 30.20      | 0.36                   | 17.25                               | 0.010                                              | 121.25                               |
| lake water              | 7.44 | 110.10     | 52.22                  | 30.23                               | 0.102                                              | 1100.25                              |
| Yellow River water      | 8.35 | 165.20     | 113.82                 | 20.74                               | 0.066                                              | 227.76                               |



Table S3. Possible structures, and EI mass spectra of LC-MS derivatives of the intermediates from LEV degradation in the CCO/PMS system.

| Intermediates number | Possible structure                                                                                        | Mass spectra                                                                                                                                                                                                 |
|----------------------|-----------------------------------------------------------------------------------------------------------|--------------------------------------------------------------------------------------------------------------------------------------------------------------------------------------------------------------|
| 1                    |  <chem>CC(=O)O</chem>    |  <p>sample-1 raw #939 RT:0.56 NL:2.7527<br/>           71 FTMS - p 85 e Full m/z 60.0432 @Prod01.00 (50.0000-80.0000)</p> |
| 2                    |  <chem>Cc1ccccc1</chem> |  <p>sample-1 raw #950 RT:1.81 NL:3.9588<br/>           71 FTMS - p 85 e Full m/z (50.0-750.0)</p>                        |

3

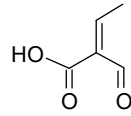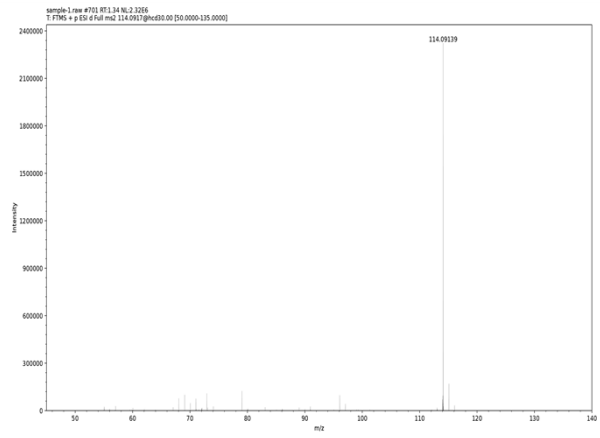

4

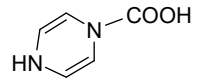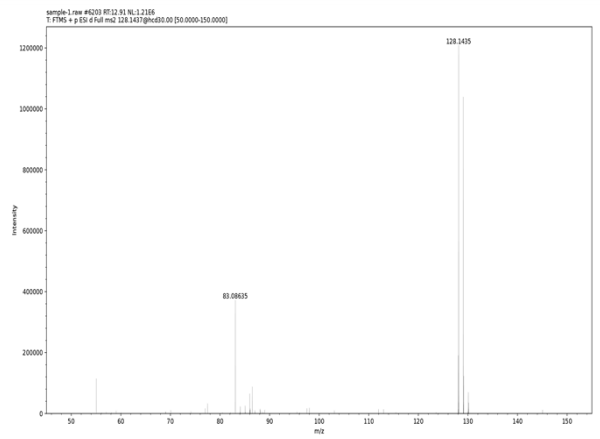

5

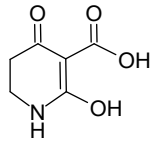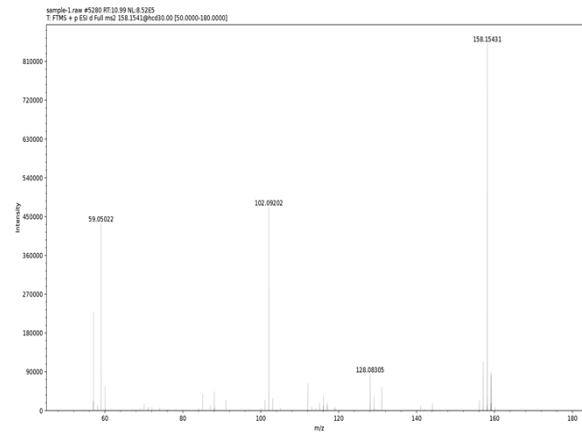

6

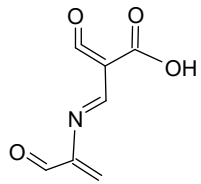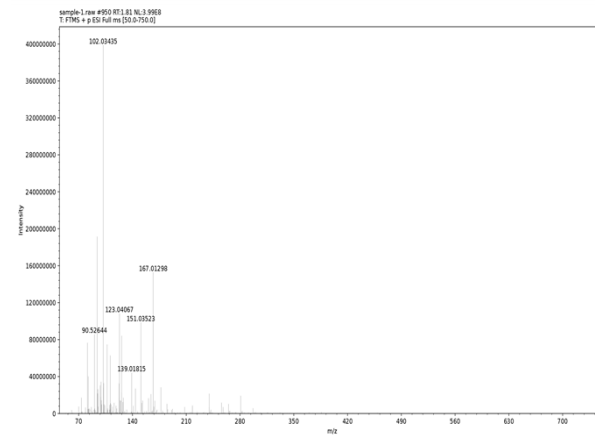

7

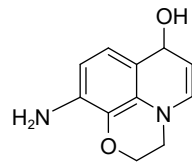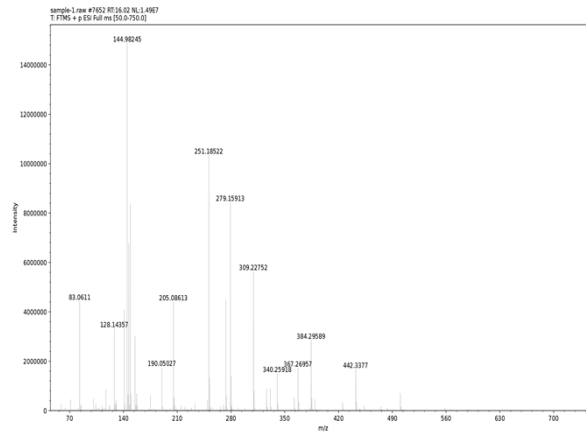

8

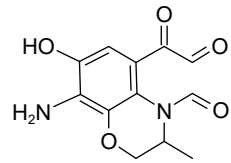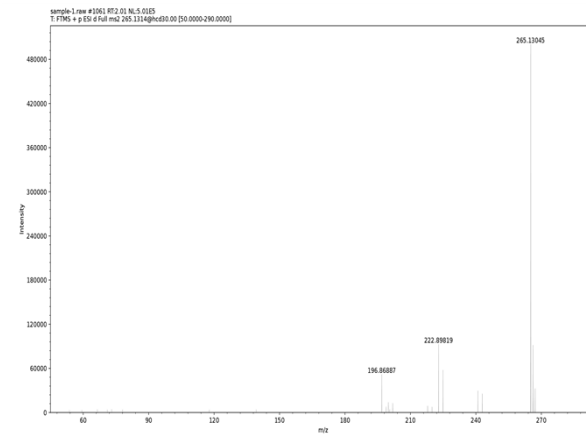

9

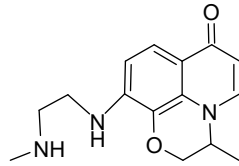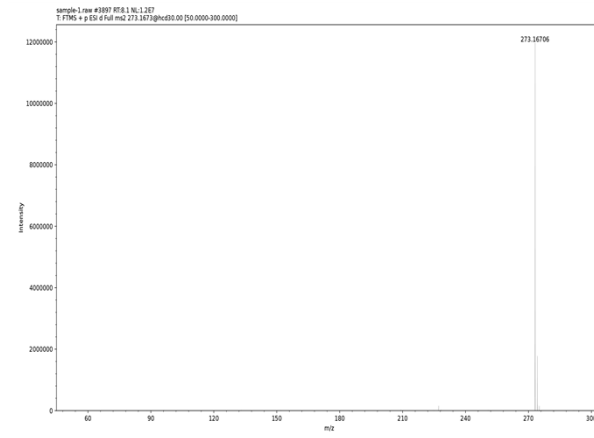

10

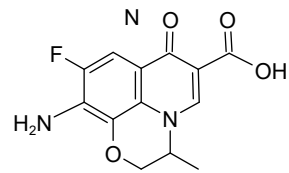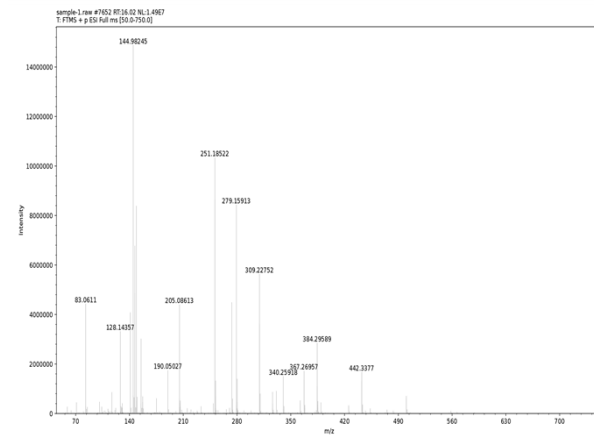

11

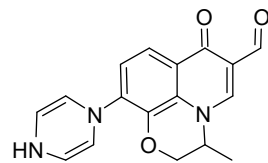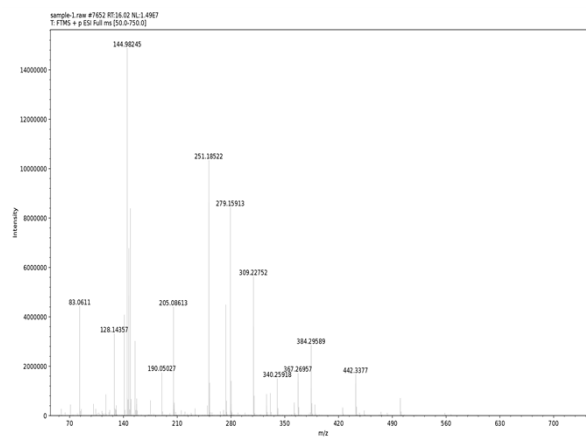

12

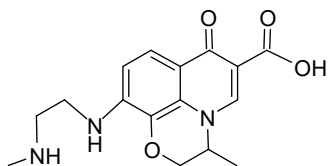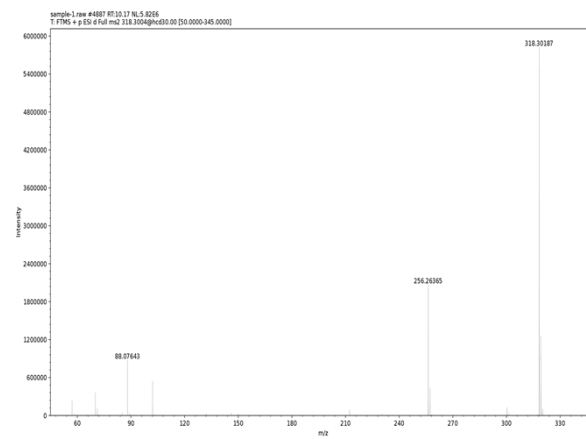

13

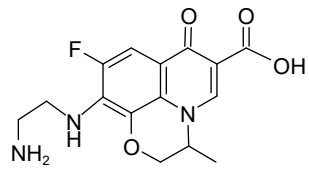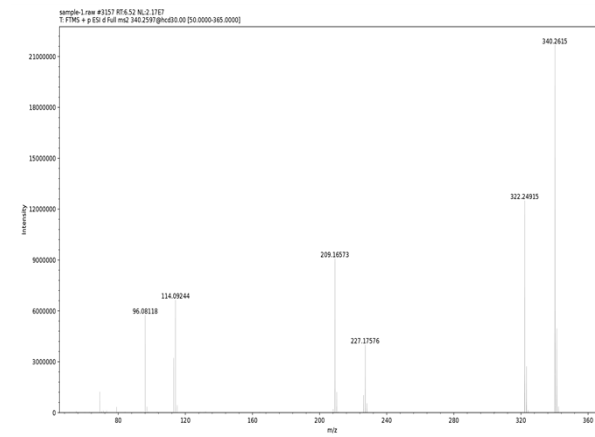

14

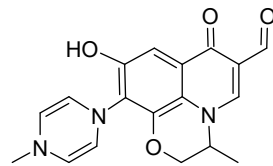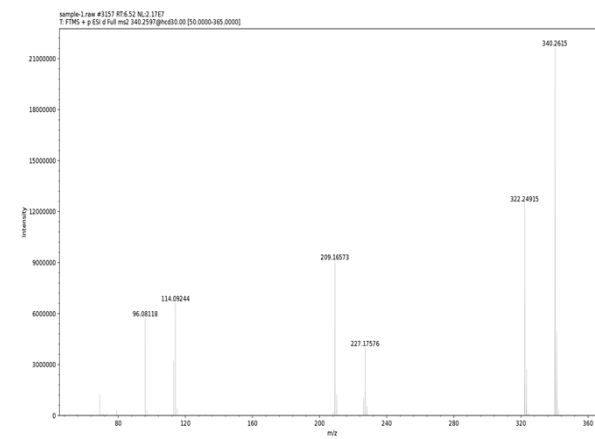

15

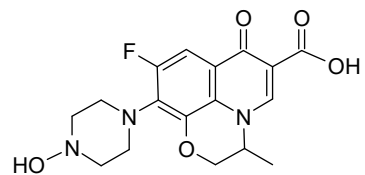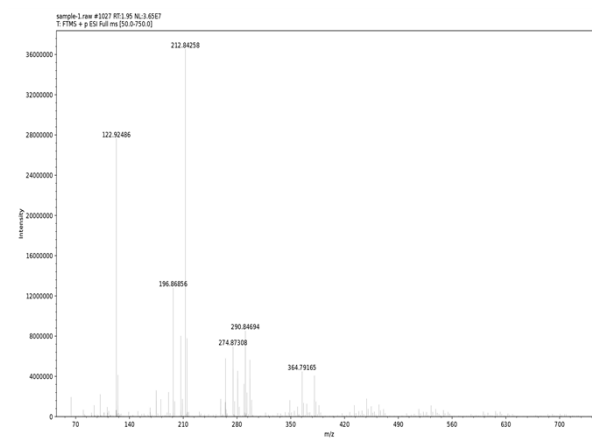



## Reference:

- 1 X. Lu, L. Wu, L. Liang, D. Liu, Y. Chen, Y. Zeng, M. Zhong and B. Jia, *J. Water Process Eng.*, 2023, **56**, 104427.
- 2 M. Cheng, Y. Huo, Z. Diao, G. Song, D. Chen, L. Hang and L. Kong, *Sep. Purif. Technol.*, 2023, **327**, 124976.
- 3 Y. Zhang, J. Qian, P. Wang, Y. He, B. Lu, S. Tang and K. Xu, *Sep. Purif. Technol.*, 2023, **309**, 123075.
- 4 M. Cheng, X. Long, P. Song, Z. Diao, G. Song, D. Chen and L. Kong, *Chem. Eng. J.*, 2024, **480**, 147885.
- 5 C. Cheng, L. Chang, X. Zhang, Q. Deng, H. Chai and Y. Huang, *Environ. Res.*, 2023, **229**, 115994.
- 6 W. Tan, Y. Ruan, Z. Diao, G. Song, M. Su, L. Hou, D. Chen, L. Kong and H. Deng, *Chemosphere*, 2021, **280**, 130626.
- 7 Q. Deng, X. Zhang, L. Chang, H. Chai and Y. Huang, *Sep. Purif. Technol.*, 2022, **294**, 121182.
- 8 J. Liu, Z. Li, M. Wang, C. Jin, J. Kang, Y. Tang and S. Li, *Sep. Purif. Technol.*, 2021, **274**, 118666.
- 9 Y. Pi, L. Ma, P. Zhao, Y. Cao, H. Gao, C. Wang, Q. Li, S. Dong and J. Sun, *J. Colloid Interface Sci.*, 2018, **526**, 18–27.
- 10 N. Q. Tung, D. T. C. Van, D. X. Thang, N. T. K. An, T. T. Trang, B. D. Nhi, N. P. Thao, L. T. Son, N. N. Huy and N. T. Dung, *J. Environ. Chem. Eng.*, 2023, **11**, 110127.
